# Supplementary material for: Co2P decorated Co3O4 nanocomposites supported on carbon cloth with enhanced electrochemical performance for asymmetric supercapacitors
Source: Royal Society of Chemistry journal article supplement (doi:10.1039/d2nj00276k), 2022-01-01
Supplement: d2nj00276k1.pdf [file d2nj00276k1.pdf]

**Co<sub>2</sub>P decorated Co<sub>3</sub>O<sub>4</sub> nanocomposites supported on carbon cloth  
with enhanced electrochemical performance for asymmetric  
supercapacitors**

Qian Zhang<sup>a</sup>, Jie Zhu<sup>a</sup>, Sudong Yang<sup>a</sup>, Lin Chen<sup>a</sup>, Maosong Sun<sup>b</sup>, Xulin Yang<sup>c</sup>, Pan Wang<sup>c</sup>, Kui Li<sup>c</sup>, Peng Zhao<sup>a,\*</sup>

<sup>a</sup> Institute for Advanced Study, Chengdu University, No.2025, Chengluo 12 Avenue, Chengdu 610106, PR China.

<sup>b</sup> Research Center for Optoelectronic Materials and Devices, School of Physical Science Technology, Guangxi University, Nanning 530004, China.

<sup>c</sup> School of Mechanical Engineering, Chengdu University, Chengdu, 610106, PR China

\*Corresponding author: Peng Zhao (zhaopeng@cdu.edu.cn)

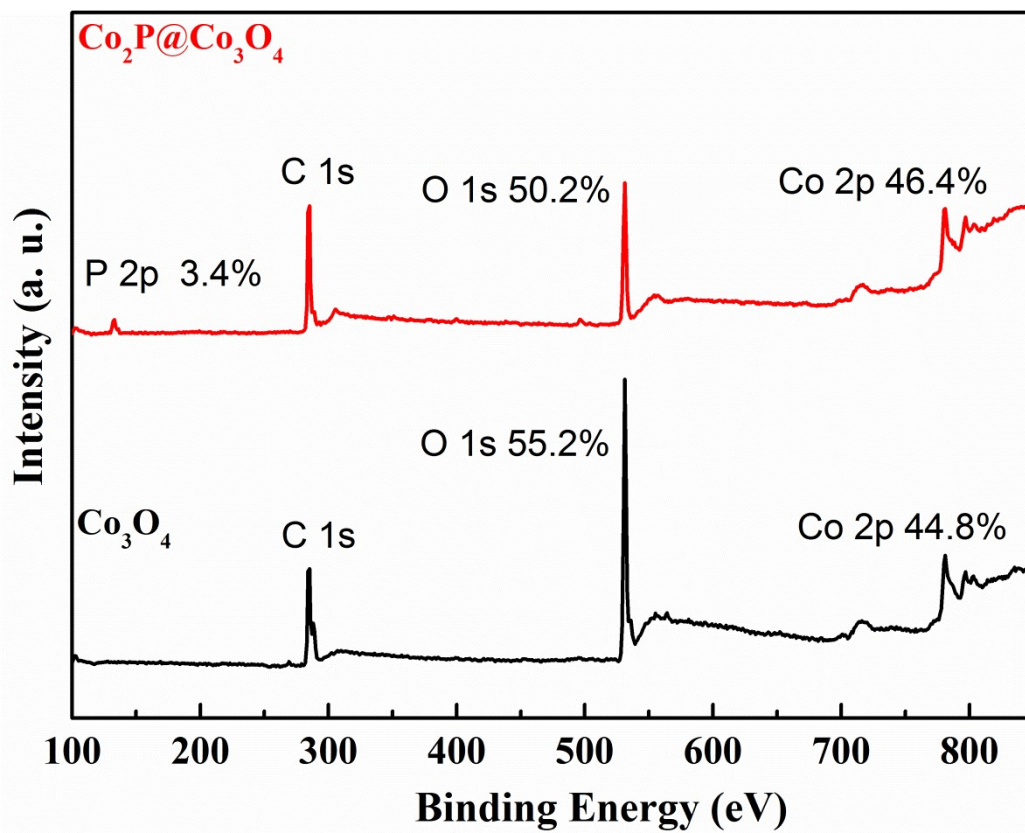

Figure S1. The xps spectra of  $\text{Co}_2\text{P}@ \text{Co}_3\text{O}_4$  and  $\text{Co}_3\text{O}_4$

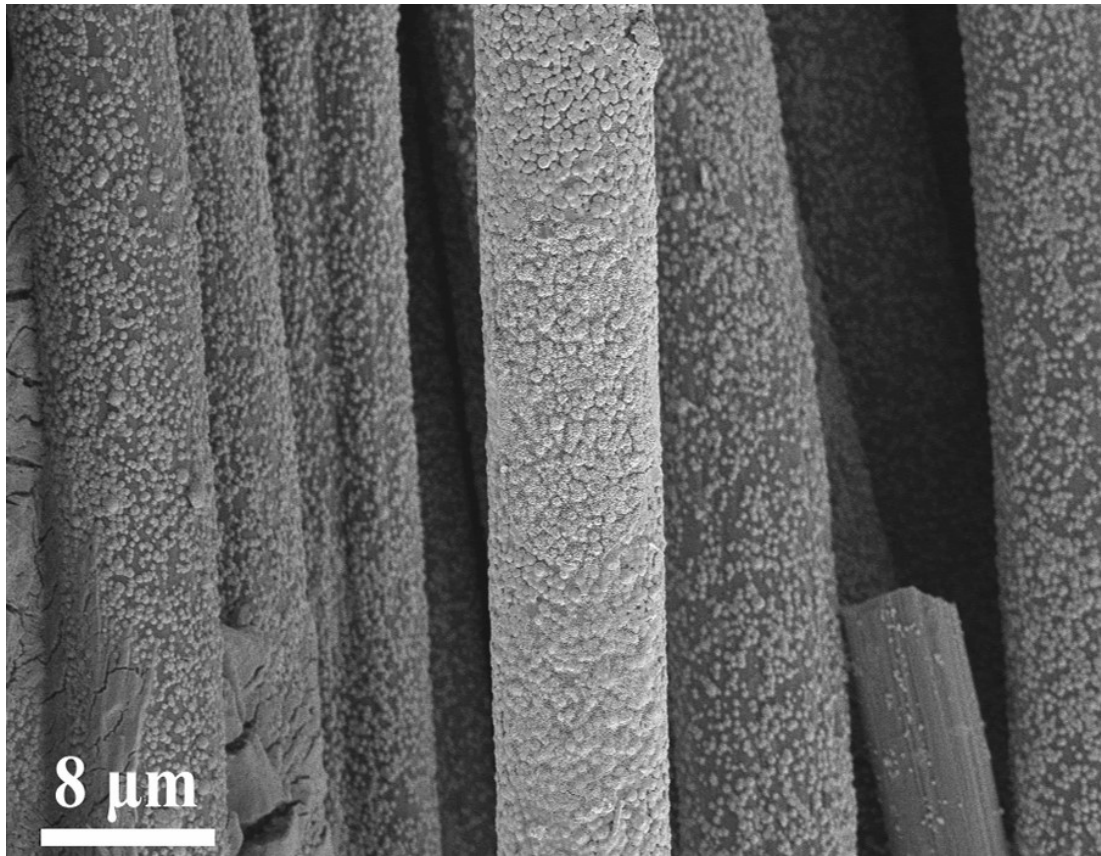

Figure S2. SEM images of Co<sub>2</sub>P@Co<sub>3</sub>O<sub>4</sub>

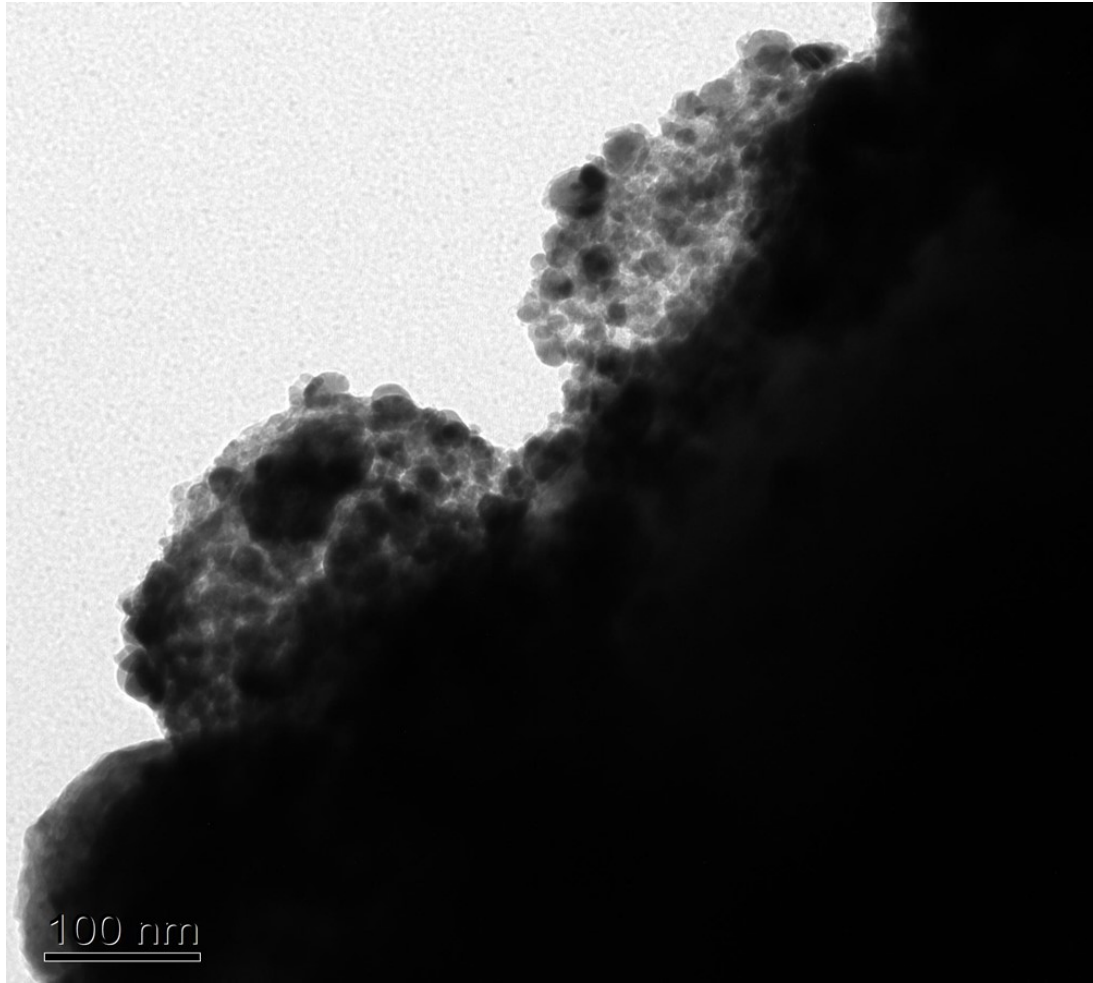

Figure S3. TEM images of Co<sub>2</sub>P@Co<sub>3</sub>O<sub>4</sub>

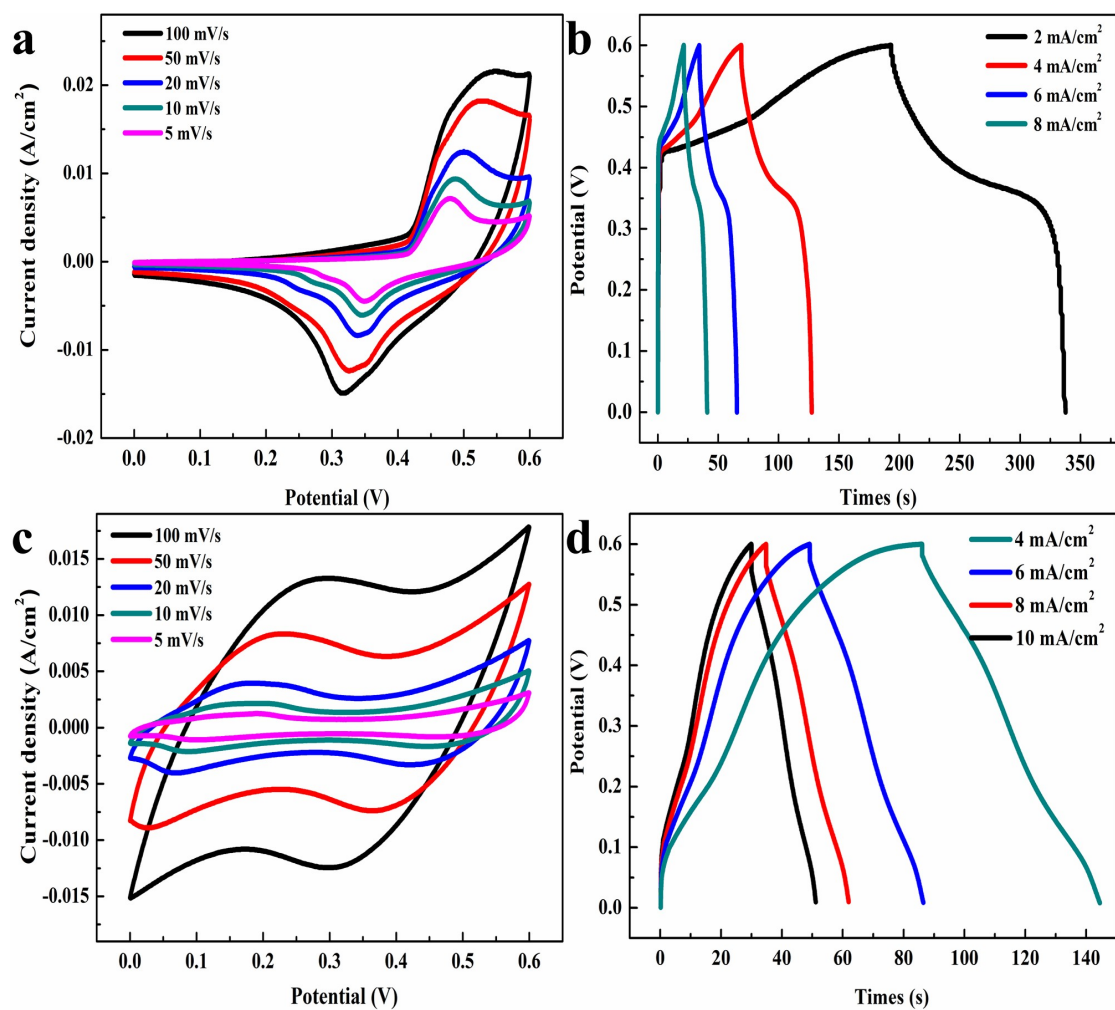

Figure S4. (a) and (b) The CV curves and GCD curves of  $\text{Co}_3\text{O}_4$ ; (c) and (d) The CV curves and GCD curves of  $\text{Co}_2\text{P}$

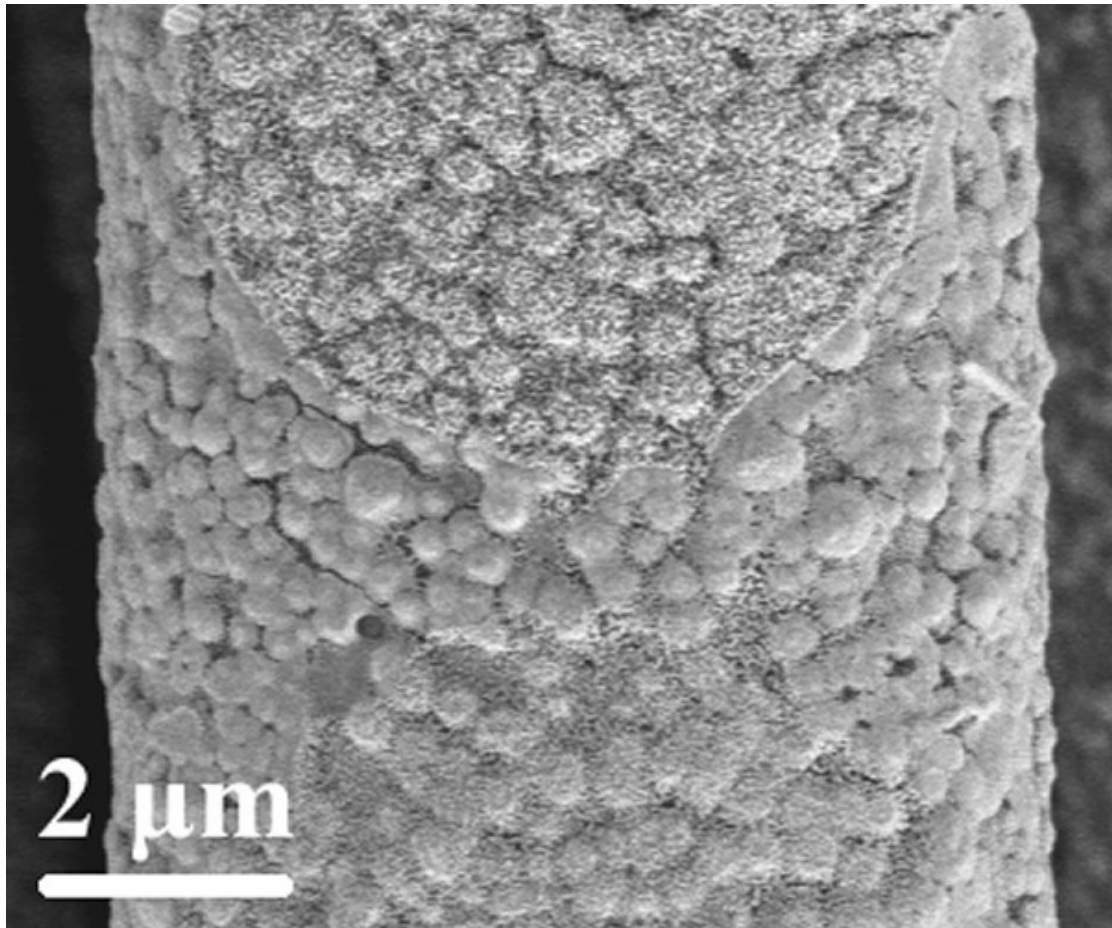

Figure S5. the SEM of the  $\text{Co}_2\text{P}@ \text{Co}_3\text{O}_4$  after cycles

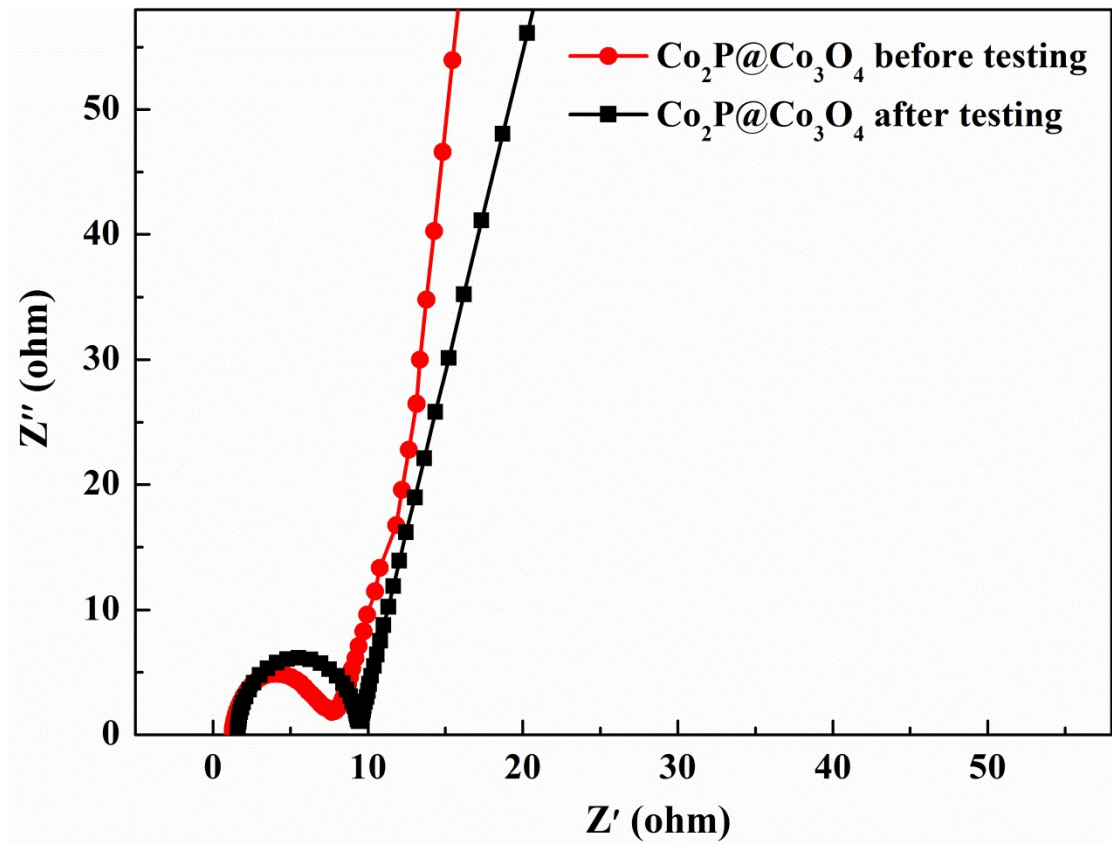

Figure S6. Nyquist plots for  $\text{Co}_2\text{P}@ \text{Co}_3\text{O}_4$  before and after testing
